# Supplementary material for: Bilateral Ductal Stenting for Discontinuity of the Pulmonary Artery via the Femoral and Carotid Arteries in an Infant
Source: Case Rep Cardiol. 2015 Mar 29;2015:619653. doi: 10.1155/2015/619653 (PMC4393910; doi:10.1155/2015/619653)
Supplement: Supplementary file 1 — Video 1: Angiography via the femoral artery shows the left-sided PDA and stenting procedures of it. Also, the other angiography via the carotid artery shows the right-sided PDA and stenting procedures of it. [file 619653.f1.zip]

Archive with 2 entries (2 files):
- mat.619653.v1.mp4
- Video 2e.mp4
